# Supplementary material for: Metabolic Labeling of Caenorhabditis elegans Primary Embryonic Cells with Azido-Sugars as a Tool for Glycoprotein Discovery
Source: PLOS journal article supplement (doi:10.1371/journal.pone.0049020), 2012-11-12
Supplement: S11 (10.1371/journal.pone.0049020.s011) [file journal.pone.0049020.s011]

Match to: **gi|17549909** Score: **263** Expect: **4e-020**  
**ASpartyl Protease family member (asp-4) [Caenorhabditis elegans]**

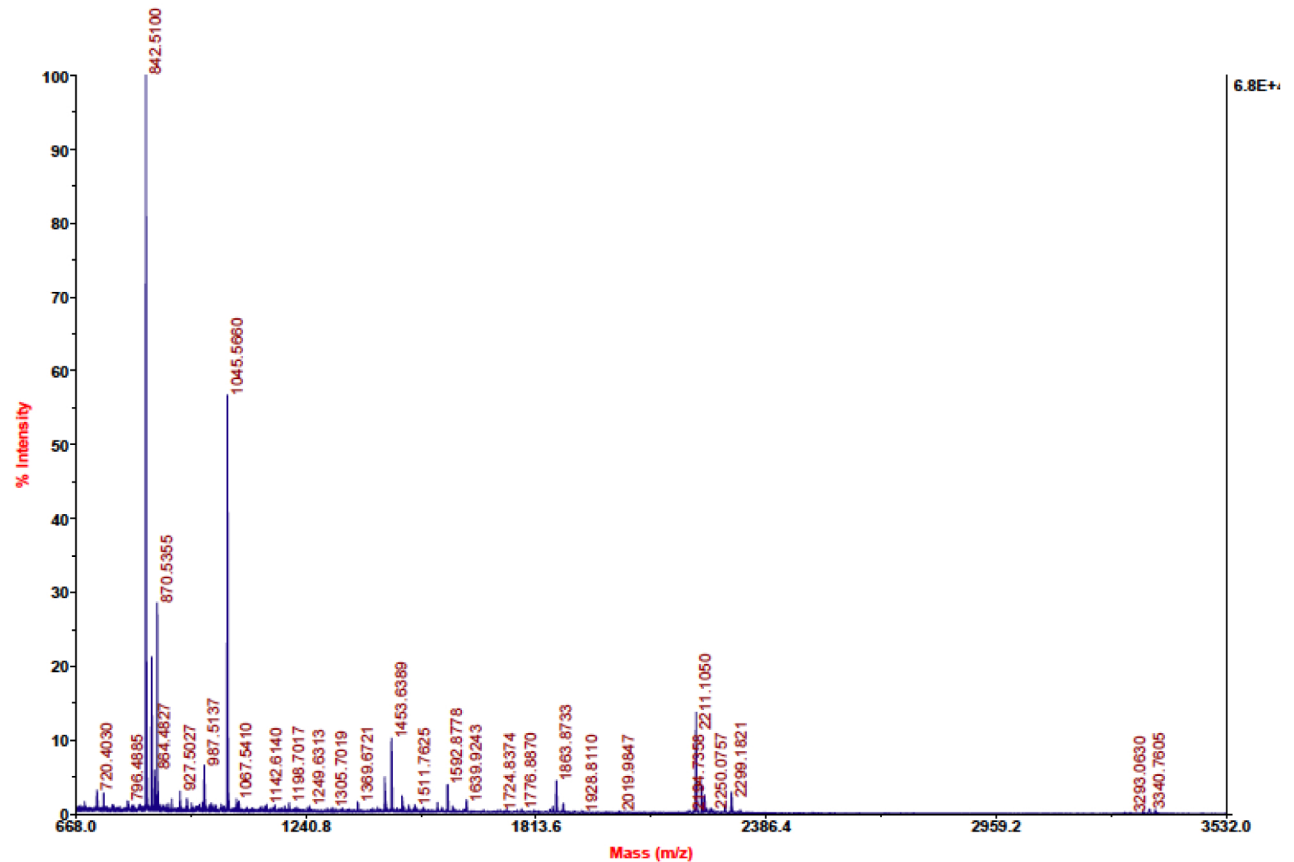

| Start - End | Observed  | Mr (expt) | Mr (calc) | ppm | Miss Sequence                            |
|-------------|-----------|-----------|-----------|-----|------------------------------------------|
| 228 - 239   | 1479.7979 | 1478.7906 | 1478.7670 | 16  | 0 K.VPSNLFSEFWLNR.N                      |
| 228 - 239   | 1479.7979 | 1478.7906 | 1478.7670 | 16  | 0 K.VPSNLFSEFWLNR.N                      |
| 240 - 257   | 1863.8732 | 1862.8659 | 1862.8646 | 1   | 0 R.NPDSEIGGEITFGGIDSR.R (Ions score 94) |
| 240 - 257   | 1863.8732 | 1862.8659 | 1862.8646 | 1   | 0 R.NPDSEIGGEITFGGIDSR.R                 |
| 258 - 270   | 1592.8778 | 1591.8705 | 1591.8722 | -1  | 1 R.RYVEPITYVPVTR.K (Ions score 21)      |
| 258 - 270   | 1592.8778 | 1591.8705 | 1591.8722 | -1  | 1 R.RYVEPITYVPVTR.K                      |
| 259 - 270   | 1436.7776 | 1435.7703 | 1435.7711 | -1  | 0 R.YVEPITYVPVTR.K (Ions score 31)       |
| 259 - 270   | 1436.7776 | 1435.7703 | 1435.7711 | -1  | 0 R.YVEPITYVPVTR.K                       |
| 272 - 280   | 1218.5554 | 1217.5481 | 1217.5539 | -5  | 1 K.GYWQFKMDK.V Oxidation (M)            |
| 309 - 325   | 1855.0264 | 1854.0191 | 1854.0251 | -3  | 0 K.AQIEAIQNFIGAEPLIK.G                  |
| 396 - 406   | 1453.6389 | 1452.6316 | 1452.6310 | 0   | 0 R.YYSVFDFDQNR.V (Ions score 71)        |
| 396 - 406   | 1453.6389 | 1452.6316 | 1452.6310 | 0   | 0 R.YYSVFDFDQNR.V                        |
| 407 - 413   | 720.4031  | 719.3959  | 719.3966  | -1  | 0 R.VGFAQAK.T (Ions score 18)            |
| 407 - 413   | 720.4031  | 719.3959  | 719.3966  | -1  | 0 R.VGFAQAK.T                            |

Match to: **gi|71994099** Score: **295** Expect: **8.7e-026**  
**ACTin family member (act-4) [Caenorhabditis elegans]**

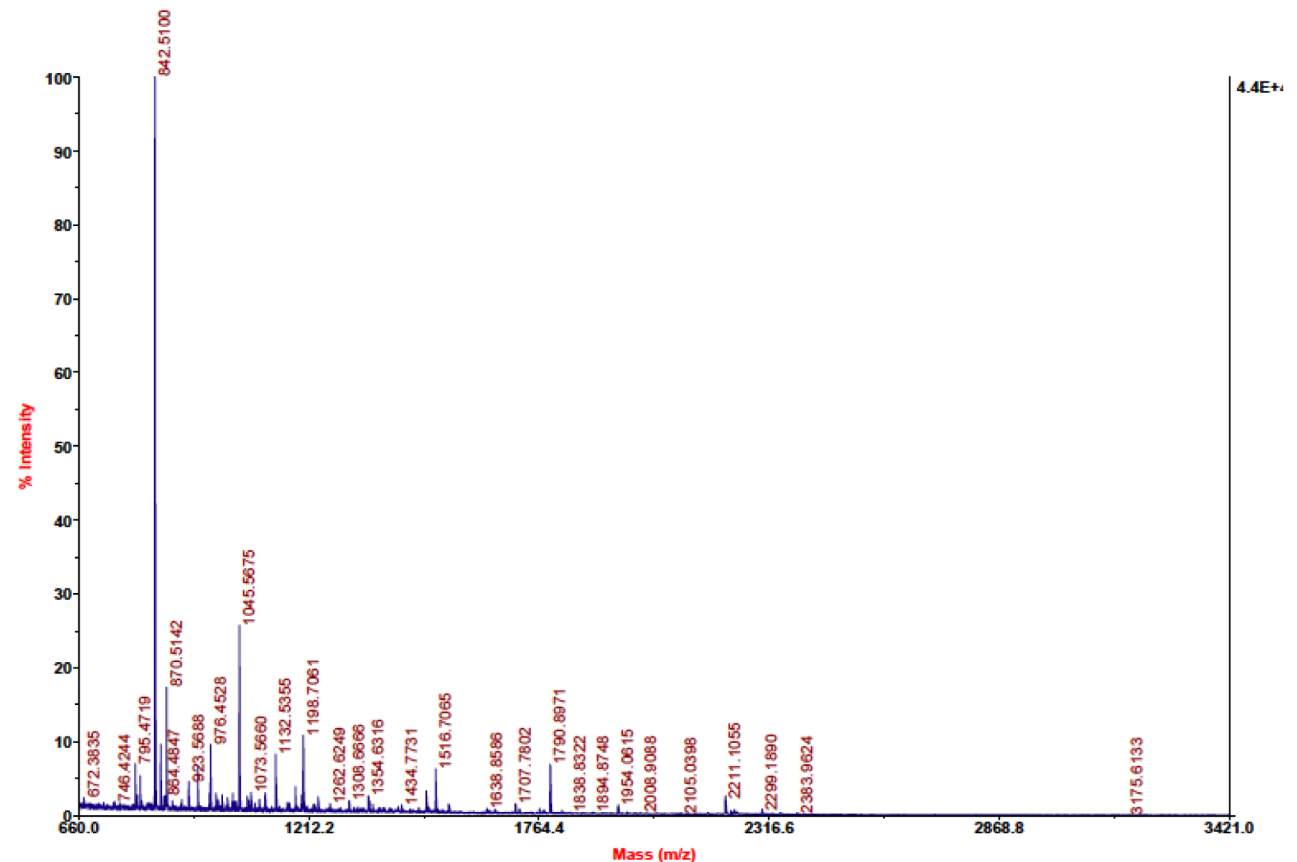

| Start - End | Observed  | Mr (expt) | Mr (calc) | ppm | Miss | Sequence                                            |
|-------------|-----------|-----------|-----------|-----|------|-----------------------------------------------------|
| 6 - 15      | 976.4528  | 975.4455  | 975.4410  | 5   | 0    | R.AGFAGDDAPR.A ( <a href="#">Ions score 34</a> )    |
| 6 - 15      | 976.4528  | 975.4455  | 975.4410  | 5   | 0    | R.AGFAGDDAPR.A                                      |
| 16 - 26     | 1198.7059 | 1197.6986 | 1197.6982 | 0   | 0    | R.AVFPSIVGRPR.H ( <a href="#">Ions score 23</a> )   |
| 16 - 26     | 1198.7059 | 1197.6986 | 1197.6982 | 0   | 0    | R.AVFPSIVGRPR.H                                     |
| 38 - 49     | 1354.6316 | 1353.6243 | 1353.6161 | 6   | 1    | K.DSYVGDEAQSKR.G ( <a href="#">Ions score 31</a> )  |
| 38 - 49     | 1354.6316 | 1353.6243 | 1353.6161 | 6   | 1    | K.DSYVGDEAQSKR.G                                    |
| 49 - 55     | 800.5206  | 799.5134  | 799.5280  | -18 | 1    | K.RGILTILK.Y                                        |
| 83 - 100    | 1954.0614 | 1953.0541 | 1953.0571 | -2  | 0    | R.VAPEEHPVLLTEAPLNPK.A                              |
| 184 - 193   | 1132.5358 | 1131.5285 | 1131.5197 | 8   | 0    | R.GYSFTTTAER.E ( <a href="#">Ions score 41</a> )    |
| 184 - 193   | 1132.5358 | 1131.5285 | 1131.5197 | 8   | 0    | R.GYSFTTTAER.E                                      |
| 226 - 241   | 1776.8818 | 1775.8745 | 1775.8690 | 3   | 0    | K.SYELPDGQVITVGNER.F                                |
| 279 - 299   | 2231.0725 | 2230.0652 | 2230.0576 | 3   | 0    | K.DLIYANTVLSGGTTMYPGIADR.M Oxidation (M)            |
| 316 - 322   | 795.4719  | 794.4646  | 794.4650  | -0  | 0    | K.IIAPPER.K ( <a href="#">Ions score 18</a> )       |
| 316 - 322   | 795.4719  | 794.4646  | 794.4650  | -0  | 0    | K.IIAPPER.K                                         |
| 316 - 323   | 923.5689  | 922.5616  | 922.5600  | 2   | 1    | K.IIAPPERK.Y ( <a href="#">Ions score 2</a> )       |
| 316 - 323   | 923.5689  | 922.5616  | 922.5600  | 2   | 1    | K.IIAPPERK.Y                                        |
| 347 - 359   | 1516.7065 | 1515.6992 | 1515.6954 | 3   | 0    | K.QEYDESGPSIVHR.K ( <a href="#">Ions score 85</a> ) |
| 347 - 359   | 1516.7065 | 1515.6992 | 1515.6954 | 3   | 0    | K.QEYDESGPSIVHR.K                                   |
| 347 - 360   | 1644.8157 | 1643.8084 | 1643.7903 | 11  | 1    | K.QEYDESGPSIVHRK.C                                  |
